# Supplementary material for: Afforested farmland vs. forestland: Effects of bark stripping by Cervus elaphus and climate on production potential and structure of Picea abies forests
Source: PLoS One. 2019 Aug 15;14(8):e0221082. doi: 10.1371/journal.pone.0221082 (PMC6695186; doi:10.1371/journal.pone.0221082)
Supplement: S1 File — (XLSX) [file pone.0221082.s001.xlsx]

## Sheet: List1
ID_tree	crown_projection_m2	DBH_mm	stem_circumference_mm	damaged_circumference_mm	damage_ratio_percent	height_m	crown_base_m	species	dead_tree
1	19.32	365	1146.1	0	0	25.1	7.6	Picea_abies	No
2	9.851	190	596.6	364	61.0124	14.8	7.4	Picea_abies	No
3	36.221	485	1522.9	0	0	25.8	10	Picea_abies	No
4	38.633	475	1491.5	0	0	27.3	4.2	Picea_abies	No
5	27.7	420	1318.8	114	8.64422	22.6	3.7	Picea_abies	No
6	25.704	425	1334.5	0	0	25.6	7.1	Picea_abies	No
7	11.357	350	1099	268	24.3858	23.3	6.4	Picea_abies	No
8	11.845	315	989.1	0	0	23.3	6.9	Picea_abies	No
9	12.721	317	995.38	0	0	21.8	7.5	Picea_abies	No
10	20.06	255	800.7	186	23.2297	16.2	6.8	Picea_abies	No
11	15.597	382	1199.48	0	0	25.3	8.6	Picea_abies	No
12	10.993	315	989.1	0	0	23.1	8.7	Picea_abies	No
13	13.945	361	1133.54	331	29.2006	25.8	8.3	Picea_abies	No
14	31.425	362	1136.68	93	8.18172	22.7	3.8	Picea_abies	No
15	21.002	296	929.44	181	19.4741	25.5	7.2	Picea_abies	No
16	11.857	219	687.66	0	0	9.9	3.8	Picea_abies	No
17	10.473	95	298.3	115	38.5518	8.6	3.5	Picea_abies	No
18	15.083	230	722.2	212	29.3547	15.4	6.5	Picea_abies	No
19	NA	45	141.3	0	0	4.6	NA	Picea_abies	Yes
20	NA	197	618.58	0	0	15.7	NA	Picea_abies	Yes
21	NA	195	612.3	0	0	11.5	NA	Picea_abies	Yes
22	19.335	349	1095.86	0	0	25.9	8.5	Picea_abies	No
23	NA	136	427.04	0	0	15.3	NA	Picea_abies	Yes
24	12.719	187	587.18	0	0	18.3	11.5	Betula	No
25	NA	192	602.88	0	0	11.5	NA	Picea_abies	Yes
26	NA	84	263.76	0	0	7.1	NA	Picea_abies	Yes
27	18.761	333	1045.62	0	0	25.3	7.9	Picea_abies	No
28	16.03	308	967.12	147	15.1998	26.1	5.5	Picea_abies	No
29	13.418	286	898.04	254	28.2838	23.4	8.9	Picea_abies	No
30	NA	52	163.28	0	0	4.6	NA	Picea_abies	Yes
31	19.892	288	904.32	0	0	23.9	14.5	Betula	No
32	34.964	414	1299.96	0	0	25.7	4.1	Picea_abies	No
33	14.454	306	960.84	0	0	24.1	9.3	Picea_abies	No
34	13.396	249	781.86	346	44.2534	21.2	12.7	Picea_abies	No
35	32.497	568	1783.52	0	0	26	3.9	Picea_abies	No
36	42.808	423	1328.22	0	0	27.5	3	Picea_abies	No
37	24.878	353	1108.42	262	23.6372	23.8	3	Picea_abies	No
38	38.161	390	1224.6	169	13.8004	21.5	2.7	Picea_abies	No
39	9.581	204	640.56	322	50.2685	17.8	9.2	Picea_abies	No
40	19.495	514	1613.96	0	0	28.4	9.2	Picea_abies	No
41	7.965	335	1051.9	57	5.41877	27.9	13.3	Picea_abies	No
42	7.715	244	766.16	71	9.26699	19.9	6.1	Picea_abies	No
43	12.693	157	492.98	284	57.6088	14.8	7	Picea_abies	No
44	6.697	272	854.08	0	0	22.3	10.1	Picea_abies	No
45	NA	190	596.6	0	0	11.9	NA	Picea_abies	Yes
46	13.386	361	1133.54	327	28.8477	25.2	14.3	Picea_abies	No
47	11.681	319	1001.66	324	32.3463	22.3	13.5	Picea_abies	No
48	NA	232	728.48	0	0	16.3	NA	Picea_abies	Yes
49	11.466	365	1146.1	196	17.1015	28.3	15.3	Picea_abies	No
50	NA	186	584.04	0	0	17.2	NA	Picea_abies	Yes
51	10.135	268	841.52	237	28.1633	23.1	14.8	Picea_abies	No
52	17.959	461	1447.54	0	0	27.7	13.9	Picea_abies	No
53	5.568	215	675.1	131	19.4045	19.9	12.5	Picea_abies	No
54	4.722	224	703.36	0	0	19.1	15.3	Picea_abies	No
55	14.443	340	1067.6	149	13.9565	26.5	11.6	Picea_abies	No
56	24.918	486	1526.04	0	0	27.9	7.3	Picea_abies	No
57	18.674	369	1158.66	224	19.3327	25.9	13.2	Picea_abies	No
58	15.875	406	1274.84	72	5.64777	27.5	13.7	Picea_abies	No
59	20.697	418	1312.52	54	4.11422	28.6	12.1	Picea_abies	No
60	21.827	364	1142.96	0	0	22.8	8.2	Picea_abies	No
61	NA	305	957.7	0	0	15.8	NA	Picea_abies	Yes
62	59.955	506	1588.84	118	7.4268	26.3	5.3	Picea_abies	No
63	26.133	384	1205.76	70	5.80547	24.4	5.5	Picea_abies	No
64	31.007	390	1224.6	143	11.6773	25.5	7.1	Picea_abies	No
65	30.007	344	1080.16	114	10.554	21.1	5.8	Picea_abies	No
66	45.24	425	1334.5	421	31.5474	21.7	8.5	Picea_abies	No
67	15.812	153	480.42	181	37.6754	9.9	3.3	Picea_abies	No
68	14.084	152	477.28	142	29.7519	7.2	4.6	Picea_abies	No
69	19.853	340	1067.6	86	8.05545	24.7	6.9	Picea_abies	No
70	37.177	460	1444.4	0	0	28.6	12.6	Picea_abies	No
71	NA	200	628	0	0	12.7	NA	Picea_abies	Yes
72	12.739	267	838.38	186	22.1856	23.2	13.9	Picea_abies	No
73	9.951	214	671.96	71	10.5661	17.9	12.9	Picea_abies	No
74	38.384	319	1001.66	132	13.1781	19.5	5.8	Picea_abies	No
75	18.08	355	1114.7	281	25.2086	25.8	8.7	Picea_abies	No
76	20.608	341	1070.74	521	48.6579	28.1	9.9	Picea_abies	No
77	32.486	275	863.5	239	27.6781	24.1	12.1	Picea_abies	No
78	27.101	516	1620.24	124	7.65319	23.9	8.4	Picea_abies	No
79	26.649	358	1124.12	135	12.0094	25.9	7.7	Picea_abies	No
80	17.519	272	854.08	370	43.3215	21.6	6.4	Picea_abies	No
81	18.337	325	1020.5	218	21.3621	22.3	6.5	Picea_abies	No
82	25.034	211	662.54	0	0	20.5	15.2	Betula	No
83	18.481	302	948.28	0	0	17.1	9.9	Picea_abies	No
84	11.524	271	850.94	0	0	24.5	12.5	Picea_abies	No
85	37.225	422	1325.08	0	0	28.1	11.2	Picea_abies	No
86	19.116	286	898.04	246	27.393	23.2	8.8	Picea_abies	No
87	17.885	431	1353.34	0	0	26.7	12.8	Picea_abies	No
88	19.316	280	879.2	0	0	24.4	8.8	Picea_abies	No
89	27.724	410	1287.4	0	0	25.1	10.8	Picea_abies	No
90	26.889	457	1434.98	0	0	26.4	10.1	Picea_abies	No
91	22.959	255	800.7	173	21.6061	23.3	12.5	Picea_abies	No
92	NA	186	584.04	263	45.0312	15.1	NA	Picea_abies	Yes
93	28.025	312	979.68	367	37.4612	23.8	9.6	Picea_abies	No
94	46.296	453	1422.42	164	11.5296	26.6	7.3	Picea_abies	No
95	25.499	312	979.68	346	35.3177	26.3	9.2	Picea_abies	No
96	32.143	364	1142.96	72	6.29943	26.2	7.3	Picea_abies	No
97	30.654	332	1042.48	0	0	25.5	10.2	Picea_abies	No
98	18.626	378	1186.92	62	5.2236	25.8	12.3	Picea_abies	No
99	20.766	283	888.62	271	30.4967	21.9	13.4	Picea_abies	No
100	27.025	422	1325.08	274	20.678	24.3	7.8	Picea_abies	No
101	29.975	398	1249.72	86	6.88154	26.7	6.4	Picea_abies	No
102	30.951	311	976.54	0	0	21.5	8.4	Picea_abies	No
103	12.565	230	722.2	0	0	12.9	10.3	Picea_abies	No
104	31.588	377	1183.78	0	0	24.2	6.3	Picea_abies	No
105	34.091	405	1271.7	0	0	25	3.9	Picea_abies	No
106	23.198	176	552.64	184	33.2947	8.2	2	Picea_abies	No
107	36.636	307	963.98	135	14.0044	17.4	5.4	Picea_abies	No
108	32.291	326	1023.64	140	13.6767	22.6	6.2	Picea_abies	No
109	30.29	378	1186.92	148	12.4692	23.9	14.7	Picea_abies	No
110	24.884	375	1177.5	0	0	25.6	13.6	Picea_abies	No
111	22.871	344	1080.16	0	0	25.6	11.1	Picea_abies	No
112	22.483	318	998.52	284	28.4421	24.1	10.2	Picea_abies	No
113	19.496	311	976.54	0	0	25.3	10.8	Picea_abies	No
114	14.701	272	854.08	0	0	15.9	9.7	Sorbus_aucuparia	No
115	NA	185	580.9	0	0	15.2	NA	Picea_abies	Yes
116	30.166	379	1190.06	36	3.02506	26.9	9.3	Picea_abies	No
117	25.181	292	916.88	266	29.0114	24.6	12.7	Picea_abies	No
118	8.297	294	923.16	497	53.8368	23.8	14.5	Picea_abies	No
119	13.396	377	1183.78	426	35.9864	24.3	13.1	Picea_abies	No
120	NA	169	530.66	0	0	13.1	NA	Picea_abies	Yes
121	11.056	225	706.5	359	50.8139	19.2	13.9	Picea_abies	No
122	18.255	386	1212.04	384	31.6821	25.2	12.7	Picea_abies	No
123	NA	220	690.8	0	0	12.2	NA	Picea_abies	Yes
124	6.741	198	621.72	214	34.4206	19.4	11.4	Picea_abies	No
125	15.976	343	1077.02	62	5.75662	24.5	10.1	Picea_abies	No
126	NA	186	584.04	0	0	13.6	NA	Picea_abies	Yes
127	7.548	206	646.84	239	36.9489	17.8	13.7	Picea_abies	No
128	10.767	337	1058.18	174	16.4433	23.8	6.7	Picea_abies	No
129	21.785	231	725.34	342	47.1503	12.7	9.6	Picea_abies	No
130	10.205	222	697.08	465	66.7068	14.6	7.2	Picea_abies	No
131	12.352	309	970.26	0	0	25.8	12.3	Picea_abies	No
132	10.876	330	1036.2	334	32.2332	23.6	10.5	Picea_abies	No
133	31	248	778.72	0	0	23.2	4.4	Fagus_sylvatica	No
134	11.575	161	505.54	274	54.1995	13.5	9.5	Picea_abies	No
135	NA	176	552.64	0	0	13.3	NA	Picea_abies	Yes
136	20.892	385	1208.9	0	0	27.2	13.1	Picea_abies	No
137	9.948	236	741.04	230	31.0375	18.1	9.7	Picea_abies	No
138	8.147	212	665.68	161	24.1858	16.3	11.1	Picea_abies	No
139	14.457	308	967.12	94	9.71958	21.9	10.6	Picea_abies	No
140	20.409	346	1086.44	358	32.9517	24.2	8.2	Picea_abies	No
141	16.888	412	1293.68	0	0	27.6	5.8	Picea_abies	No
142	NA	166	521.24	0	0	14.8	NA	Picea_abies	Yes
143	13.706	181	568.34	156	27.4484	16.9	8.9	Picea_abies	No
144	13.573	79	248.06	0	0	7.8	1.4	Fagus_sylvatica	No
145	NA	104	326.56	0	0	10.2	NA	Picea_abies	Yes
146	17.456	302	948.28	0	0	23.6	7.2	Picea_abies	No
147	20.696	247	775.58	0	0	18.9	12.1	Betula	No
148	21.131	346	1086.44	0	0	19.4	6.7	Picea_abies	No
149	21.605	328	1029.92	74	7.18502	21.9	7.9	Picea_abies	No
150	22.955	442	1387.88	643	46.3297	24.5	9.8	Picea_abies	No
151	26.556	279	876.06	419	47.8278	21.7	9.8	Picea_abies	No
152	13.083	324	1017.36	71	6.97885	24.3	6.5	Picea_abies	No
153	17.184	307	963.98	362	37.5526	22.9	10.4	Picea_abies	No
154	15.542	340	1067.6	215	20.1386	19.6	9.1	Picea_abies	No
155	20.574	329	1033.06	356	34.4607	24.5	10.1	Picea_abies	No
156	18.208	328	1029.92	79	7.6705	23.6	8.7	Picea_abies	No
157	14.67	247	775.58	0	0	21.1	14.3	Betula	No
158	17.064	329	1033.06	97	9.38958	22.3	7.2	Picea_abies	No
159	NA	251	788.14	0	0	11.9	NA	Picea_abies	Yes
160	22.784	395	1240.3	141	11.3682	26.8	9.8	Picea_abies	No
161	8.865	151	474.14	0	0	12.8	9.1	Picea_abies	No
162	8.343	202	634.28	0	0	18.1	9.2	Picea_abies	No
163	14.27	218	684.52	0	0	20.1	9.3	Picea_abies	No
164	11.799	189	593.46	0	0	14.9	7.8	Picea_abies	No
165	10.523	312	979.68	0	0	26.5	10.5	Picea_abies	No
166	16.813	327	1026.78	0	0	24.1	10.6	Picea_abies	No
167	38.379	575	1805.5	0	0	30.4	8.2	Picea_abies	No
168	21.077	256	803.84	0	0	20.5	12.3	Picea_abies	No
169	14.984	266	835.24	0	0	21.8	13.7	Picea_abies	No
170	22.775	427	1340.78	0	0	28.3	9.3	Picea_abies	No
171	17.137	237	744.18	0	0	23.6	13.1	Picea_abies	No
172	40.531	388	1218.32	0	0	25.4	14.3	Picea_abies	No
173	26.073	525	1648.5	0	0	28.3	9.2	Picea_abies	No
174	20.262	481	1510.34	0	0	27.9	7.8	Picea_abies	No
175	21.727	267	838.38	0	0	23.3	8.9	Picea_abies	No
176	13.242	206	646.84	0	0	20.9	7.4	Picea_abies	No
177	26.668	480	1507.2	0	0	28.7	6.7	Picea_abies	No
178	15.354	293	920.02	0	0	24.3	11.5	Picea_abies	No
179	18.364	317	995.38	0	0	25.6	9.7	Picea_abies	No
180	30.615	348	1092.72	0	0	23.9	11.3	Picea_abies	No
181	40.615	554	1739.56	0	0	30.8	9.4	Picea_abies	No
182	9.987	325	1020.5	0	0	26	11.4	Picea_abies	No
183	22.424	429	1347.06	0	0	30.2	13.8	Picea_abies	No
184	15.146	235	737.9	0	0	22	14.5	Picea_abies	No
185	30.043	421	1321.94	0	0	26.9	15.2	Picea_abies	No
186	42.186	474	1488.36	0	0	29.9	11.7	Picea_abies	No
187	14.338	232	728.48	0	0	20.9	10.3	Picea_abies	No
188	16.368	359	1127.26	0	0	25.2	10.6	Picea_abies	No
189	12.121	285	894.9	0	0	21.3	12.1	Picea_abies	No
190	24.353	355	1114.7	0	0	24.7	14.3	Picea_abies	No
191	23.134	286	898.04	0	0	25.9	15.1	Picea_abies	No
192	19.018	306	960.84	0	0	27.2	14.3	Picea_abies	No
193	19.77	341	1070.74	0	0	27.1	12.8	Picea_abies	No
194	29.229	392	1230.88	0	0	28.2	10.8	Picea_abies	No
195	16.209	262	822.68	0	0	21.3	16.8	Picea_abies	No
196	23.615	349	1095.86	0	0	27.2	15.4	Picea_abies	No
197	16.384	301	945.14	0	0	28.2	9.7	Picea_abies	No
198	24.989	335	1051.9	0	0	25.3	13.5	Picea_abies	No
199	12.786	235	737.9	0	0	22.8	15.6	Picea_abies	No
200	18.882	238	747.32	0	0	20.8	14.5	Picea_abies	No
201	16.216	282	885.48	0	0	25.5	13.3	Picea_abies	No
202	15.643	279	876.06	0	0	20.8	15.2	Picea_abies	No
203	14.215	308	967.12	0	0	25.4	13.9	Picea_abies	No
204	13.891	323	1014.22	0	0	26.8	12.9	Picea_abies	No
205	12.67	351	1102.14	0	0	27.2	10.8	Picea_abies	No
206	19.651	313	982.82	0	0	25.4	11.5	Picea_abies	No
207	24.338	371	1164.94	0	0	25.3	13.6	Picea_abies	No
208	20.733	383	1202.62	0	0	23.7	12.9	Picea_abies	No
209	40.792	454	1425.56	0	0	30.2	16.1	Picea_abies	No
210	27.596	246	772.44	0	0	19.1	12.6	Picea_abies	No
211	30.934	464	1456.96	0	0	29.6	15.7	Picea_abies	No
212	33.782	421	1321.94	0	0	27.4	15.7	Picea_abies	No
213	17.618	387	1215.18	0	0	27.3	13.9	Picea_abies	No
214	20.231	300	942	0	0	23.6	15.6	Picea_abies	No
215	28.882	415	1303.1	0	0	28.8	10.7	Picea_abies	No
216	25.632	377	1183.78	0	0	29.4	11.4	Picea_abies	No
217	19.704	352	1105.28	0	0	26.4	12.7	Picea_abies	No
218	23.446	371	1164.94	0	0	26.3	12.3	Picea_abies	No
219	24.638	366	1149.24	0	0	23.8	13.6	Picea_abies	No
220	18.177	391	1227.74	0	0	28.9	13	Picea_abies	No
221	20.65	346	1086.44	0	0	28.7	10.2	Picea_abies	No
222	21.72	332	1042.48	0	0	27.6	15.8	Picea_abies	No
223	23.282	229	719.06	0	0	19.8	9.2	Picea_abies	No
224	13.313	250	785	0	0	22.5	114	Picea_abies	No
225	36.828	428	1343.92	0	0	27.6	11.5	Picea_abies	No
226	26.936	397	1246.58	0	0	28.9	9.6	Picea_abies	No
227	27.321	331	1039.34	0	0	26.4	10.6	Picea_abies	No
228	15.691	343	1077.02	0	0	26.7	12.7	Picea_abies	No
229	17.525	355	1114.7	0	0	26.8	8.2	Picea_abies	No
230	12.643	356	1117.84	0	0	29.4	16.6	Picea_abies	No
231	17.845	289	907.46	0	0	23.6	10.4	Picea_abies	No
232	14.433	259	813.26	0	0	25.8	16	Picea_abies	No
233	25.812	441	1384.74	0	0	28.2	13.4	Picea_abies	No
234	11.502	243	763.02	0	0	24.4	10.2	Picea_abies	No
235	13.487	246	772.44	0	0	25.3	17.5	Picea_abies	No
236	26.358	394	1237.16	0	0	27.4	11.5	Picea_abies	No
237	27.95	403	1265.42	0	0	27.5	14.6	Picea_abies	No
238	26.398	411	1290.54	0	0	29.1	15.6	Picea_abies	No
239	12.366	200	628	0	0	23.6	14.8	Picea_abies	No
240	17.492	312	979.68	0	0	26.1	12.1	Picea_abies	No
241	20.019	403	1265.42	0	0	29.3	12.1	Picea_abies	No
242	16.045	308	967.12	0	0	27.5	16.7	Picea_abies	No
243	26.812	377	1183.78	0	0	27.6	17	Picea_abies	No
244	24.162	476	1494.64	0	0	28.6	13.3	Picea_abies	No
245	15.13	289	907.46	0	0	22.6	12.1	Picea_abies	No
246	19.441	372	1168.08	0	0	27.6	13.4	Picea_abies	No
247	30.005	429	1347.06	0	0	27.9	12.4	Picea_abies	No
248	26.103	479	1504.06	0	0	29.8	12.9	Picea_abies	No
249	20.735	406	1274.84	0	0	27.9	12.3	Picea_abies	No
250	18.754	327	1026.78	0	0	24.2	12.7	Picea_abies	No
251	22.733	312	979.68	0	0	24.1	12.1	Picea_abies	No
252	111.861	293	920.02	0	0	23.6	6.7	Fagus_sylvatica	No
253	86.231	241	756.74	0	0	21.6	6.3	Fagus_sylvatica	No
254	34.995	314	985.96	0	0	22.3	16.3	Picea_abies	No
255	37.5	442	1387.88	0	0	30.2	9	Picea_abies	No
256	23.914	318	998.52	0	0	25.2	9.3	Picea_abies	No
257	30.105	357	1120.98	0	0	28.3	12.1	Picea_abies	No
258	17.646	352	1105.28	0	0	26.6	13	Picea_abies	No
259	14.277	348	1092.72	0	0	27.4	16.3	Picea_abies	No
260	16.662	324	1017.36	0	0	27.1	10.4	Picea_abies	No
261	17.27	201	631.14	0	0	20.7	11.3	Picea_abies	No
262	13.634	304	954.56	0	0	25.6	10.6	Picea_abies	No
263	18.559	327	1026.78	0	0	28.5	13.1	Picea_abies	No
264	11.287	274	860.36	0	0	23.5	15.2	Picea_abies	No
265	11.982	345	1083.3	0	0	28.6	8	Picea_abies	No
266	16.946	361	1133.54	0	0	28.2	9.8	Picea_abies	No
267	14.225	319	1001.66	0	0	26.9	16.2	Picea_abies	No
268	13.269	312	979.68	0	0	26.1	9.8	Picea_abies	No
269	18.951	333	1045.62	0	0	26	8.4	Picea_abies	No
270	23.956	316	992.24	0	0	26.7	12.5	Picea_abies	No
271	19.088	277	869.78	0	0	25.6	14.1	Picea_abies	No
272	28.188	344	1080.16	0	0	26.5	7.2	Picea_abies	No
273	21.304	307	963.98	0	0	25.6	13.5	Picea_abies	No
274	30.759	445	1397.3	0	0	29.3	6.9	Picea_abies	No
275	28.835	384	1205.76	0	0	26.7	9.6	Picea_abies	No
276	35.956	551	1730.14	132	7.62944	36.6	12.3	Picea_abies	No
277	20.904	460	1444.4	73	5.054	34.4	15.1	Picea_abies	No
278	15.986	364	1142.96	183	16.0111	23.2	13.6	Picea_abies	No
279	17.865	258	810.12	286	35.3034	17.5	11	Picea_abies	No
280	15.319	376	1180.64	532	45.0603	26.7	12.2	Picea_abies	No
281	18.056	418	1312.52	248	18.895	32.2	14.9	Picea_abies	No
282	17.973	455	1428.7	0	0	34.8	22.1	Larix	No
283	29.139	397	1246.58	246	19.734	24.8	13.1	Picea_abies	No
284	NA	329	1033.06	294	28.4591	16.4	NA	Picea_abies	Yes
285	15.743	412	1293.68	283	21.8756	33.5	18.2	Picea_abies	No
286	28.293	505	1585.7	234	14.7569	31.6	15.2	Picea_abies	No
287	12.204	217	681.38	0	0	27	22.2	Larix	No
288	24.489	624	1959.36	540	27.56	35.3	8.9	Picea_abies	No
289	36.854	526	1651.64	0	0	33.8	16.6	Picea_abies	No
290	26.479	312	979.68	236	24.0895	25.9	8.7	Picea_abies	No
291	34.332	534	1676.76	213	12.7031	30.5	7.7	Picea_abies	No
292	21.63	473	1485.22	221	14.88	34.2	13.1	Picea_abies	No
293	13.011	310	973.4	0	0	31.3	15.8	Larix	No
294	23.302	482	1513.48	234	15.4611	35.2	11.3	Picea_abies	No
295	26.022	358	1124.12	314	27.933	28.6	12.1	Picea_abies	No
296	27.427	347	1089.58	356	32.6731	31.4	19.7	Picea_abies	No
297	23.024	392	1230.88	236	19.1733	33.2	15.7	Picea_abies	No
298	35.102	465	1460.1	418	28.6282	33.6	18.8	Picea_abies	No
299	57.085	634	1990.76	0	0	33.8	20.2	Picea_abies	No
300	44.441	551	1730.14	184	10.635	36.8	17.3	Picea_abies	No
301	25.381	367	1152.38	337	29.2438	30.6	17.9	Picea_abies	No
302	33.928	535	1679.9	412	24.5253	35.6	18.9	Picea_abies	No
303	11.903	253	794.42	85	10.6996	18.2	3.3	Picea_abies	No
304	NA	235	737.9	0	0	15.2	NA	Betula	Yes
305	32.759	443	1391.02	284	20.4167	31.8	6.2	Picea_abies	No
306	39.415	533	1673.62	341	20.375	34.2	5	Picea_abies	No
307	32.06	314	985.96	406	41.1781	24.3	4.4	Picea_abies	No
308	36.817	468	1469.52	324	22.048	33.6	5.4	Picea_abies	No
309	44.667	434	1362.76	193	14.1624	32.3	3.9	Picea_abies	No
310	28.026	517	1623.38	0	0	35.9	10.4	Picea_abies	No
311	13.926	428	1343.92	0	0	33.1	15.9	Picea_abies	No
312	22.101	603	1893.42	0	0	34.2	21.6	Larix	No
313	20.571	413	1296.82	139	10.7185	34.2	19.7	Picea_abies	No
314	19.311	301	945.14	596	63.0594	29.2	6.3	Picea_abies	No
315	23.549	368	1155.52	291	25.1835	31.3	14.1	Picea_abies	No
316	23.745	523	1642.22	79	4.81056	34.9	15.8	Picea_abies	No
317	30.286	573	1799.22	220	12.2275	35.8	11.3	Picea_abies	No
318	28.785	390	1224.6	522	42.6262	27.8	12.4	Picea_abies	No
319	26.292	412	1293.68	379	29.2963	26.7	6.2	Picea_abies	No
320	19.692	343	1077.02	538	49.9526	28.2	12.4	Picea_abies	No
321	32.318	615	1931.1	47	2.43385	34.6	11.5	Picea_abies	No
322	17.463	411	1290.54	0	0	32.3	13.4	Picea_abies	No
323	21.127	423	1328.22	0	0	32.8	16.3	Picea_abies	No
324	32.87	375	1177.5	397	33.7155	28.9	6.3	Picea_abies	No
325	25.052	436	1369.04	194	14.1705	32.8	8.5	Picea_abies	No
326	19.509	471	1478.94	96	6.49114	31.6	8.7	Picea_abies	No
327	16.059	245	769.3	0	0	31.3	21.9	Larix	No
328	15.555	499	1566.86	41	2.6167	34.2	7.3	Picea_abies	No
329	16.502	403	1265.42	0	0	36.1	22.8	Larix	No
330	17.673	219	687.66	257	37.3731	16.6	3.4	Picea_abies	No
331	16.978	386	1212.04	376	31.0221	31.9	8.6	Picea_abies	No
332	20.892	400	1256	0	0	32.6	18.9	Picea_abies	No
333	34.329	558	1752.12	254	14.4967	34.8	13.9	Picea_abies	No
334	34.115	498	1563.72	0	0	32.6	21.2	Larix	No
335	26.177	462	1450.68	0	0	35.4	22.1	Larix	No
336	34.717	524	1645.36	0	0	36.4	21.2	Larix	No
337	15.053	238	747.32	0	0	32.1	22.2	Larix	No
338	20.542	457	1434.98	0	0	33.8	17.2	Larix	No
339	16.399	344	1080.16	0	0	36.5	20.6	Larix	No
340	14.071	302	948.28	0	0	35.2	24.7	Larix	No
341	NA	167	524.38	0	0	21.9	NA	Larix	Yes
342	20.976	286	898.04	316	35.1877	24.2	7.1	Picea_abies	No
343	20.599	424	1331.36	0	0	33.7	19.9	Larix	No
344	16.539	451	1416.14	0	0	36.7	23.1	Larix	No
345	5.992	253	794.42	0	0	32.9	25.6	Larix	No
346	16.645	416	1306.24	0	0	36.8	24.4	Larix	No
347	23.553	474	1488.36	391	26.2705	34.8	5.1	Picea_abies	No
348	16.702	338	1061.32	0	0	33.9	24.6	Larix	No
349	NA	199	624.86	0	0	25.7	NA	Larix	Yes
350	19.228	473	1485.22	94	6.32903	34.6	8.3	Picea_abies	No
351	19.06	421	1321.94	214	16.1883	29.8	10.6	Picea_abies	No
352	13.494	353	1108.42	0	0	32.8	22.1	Larix	No
353	19.196	332	1042.48	0	0	35.2	24.3	Larix	No
354	17.323	312	979.68	412	42.0545	22.8	6.9	Picea_abies	No
355	21.24	398	1249.72	0	0	25.9	12.3	Picea_abies	No
356	14.31	318	998.52	0	0	33.6	26.2	Larix	No
357	20.159	484	1519.76	234	15.3972	32.6	4.4	Picea_abies	No
358	32.012	473	1485.22	179	12.0521	34.5	3.9	Picea_abies	No
359	30.525	501	1573.14	76	4.8311	33.7	8.1	Picea_abies	No
360	40.167	564	1770.96	365	20.6103	35.2	3.9	Picea_abies	No
361	56.805	674	2116.36	341	16.1126	32.6	5.6	Picea_abies	No
362	14.872	157	492.98	184	37.324	9.1	2.4	Picea_abies	No
363	35.454	483	1516.62	221	14.5719	30.6	4.3	Picea_abies	No
364	45.924	532	1670.48	176	10.5359	31.3	6.8	Picea_abies	No
365	13.231	184	577.76	68	11.7696	16.3	4.4	Picea_abies	No
366	13.571	137	430.18	64	14.8775	11.3	3.5	Picea_abies	No
367	46.692	563	1767.82	314	17.762	31.6	3.4	Picea_abies	No
368	30.127	576	1808.64	220	12.1638	33.5	5.6	Picea_abies	No
369	25.343	550	1727	131	7.58541	35.3	4.8	Picea_abies	No
370	19.831	489	1535.46	0	0	35.4	13.8	Picea_abies	No
371	23.213	329	1033.06	587	56.8215	23.2	6.4	Picea_abies	No
372	44.902	544	1708.16	295	17.27	28.9	3.6	Picea_abies	No
373	22.992	468	1469.52	0	0	33.9	4.3	Picea_abies	No
374	16.994	369	1158.66	0	0	32.6	22.2	Larix	No
375	14.638	307	963.98	0	0	25.2	7.1	Picea_abies	No
376	14.845	257	806.98	0	0	18.4	8.6	Picea_abies	No
377	14.315	254	797.56	0	0	23.2	7.4	Picea_abies	No
378	25.379	508	1595.12	263	16.4878	35.7	17.5	Picea_abies	No
379	NA	161	505.54	0	0	11.5	NA	Betula	Yes
380	15.236	347	1089.58	278	25.5144	28.6	18.6	Picea_abies	No
381	10.906	305	957.7	436	45.5257	27.6	17.5	Picea_abies	No
382	20.931	539	1692.46	482	28.4793	34.1	15.8	Picea_abies	No
383	21.214	436	1369.04	0	0	31.9	18.1	Picea_abies	No
384	10.689	233	731.62	572	78.1827	25.8	15.4	Picea_abies	No
385	NA	272	854.08	196	22.9487	23.4	NA	Picea_abies	Yes
386	9.254	359	1127.26	321	28.4761	30.8	13.2	Picea_abies	No
387	10.65	311	976.54	342	35.0216	27.3	15	Picea_abies	No
388	9.774	402	1262.28	782	61.9514	30.2	19.5	Picea_abies	No
389	14.976	294	923.16	448	48.529	21.9	6.4	Picea_abies	No
390	15.569	335	1051.9	132	12.5487	30.6	5.6	Picea_abies	No
391	21.449	426	1337.64	182	13.6061	33.6	9.7	Picea_abies	No
392	26.463	682	2141.48	96	4.48288	35.3	12.7	Picea_abies	No
393	30.555	463	1453.82	392	26.9634	34.3	7.8	Picea_abies	No
394	21.185	440	1381.6	329	23.813	33.6	17.8	Picea_abies	No
395	22.705	471	1478.94	112	7.57299	33.4	15.1	Picea_abies	No
396	24.229	507	1591.98	0	0	33.4	13	Picea_abies	No
397	17.454	393	1234.02	284	23.0142	33.2	10.1	Picea_abies	No
398	13.174	407	1277.98	118	9.23332	33.6	18	Picea_abies	No
399	15.167	489	1535.46	224	14.5885	33.9	14.4	Picea_abies	No
400	11.478	443	1391.02	532	38.2453	35.8	12.6	Picea_abies	No
401	12.558	407	1277.98	169	13.224	35.6	12.3	Picea_abies	No
402	35.41	613	1924.82	245	12.7285	36.8	10.2	Picea_abies	No
403	17.245	415	1303.1	256	19.6455	34.2	13.5	Picea_abies	No
404	32.981	259	813.26	136	16.7228	24.7	6.6	Picea_abies	No
405	23.553	493	1548.02	124	8.01023	31.1	14.4	Picea_abies	No
406	12.759	353	1108.42	498	44.9288	32.7	18	Picea_abies	No
407	14.756	394	1237.16	294	23.7641	30.4	17.1	Picea_abies	No
408	20.498	447	1403.58	361	25.7199	30.6	13.2	Picea_abies	No
409	16.301	388	1218.32	310	25.4449	28.8	14.7	Picea_abies	No
410	15.883	412	1293.68	0	0	30.5	13.3	Picea_abies	No
411	13.1	282	885.48	0	0	24.5	13.2	Picea_abies	No
412	12.588	341	1070.74	228	21.2937	29.4	15.1	Picea_abies	No
413	20.746	438	1375.32	317	23.0492	31.3	14.1	Picea_abies	No
414	28.389	269	844.66	284	33.623	24.7	11.4	Picea_abies	No
415	NA	280	879.2	156	17.7434	23.4	NA	Betula	Yes
416	NA	242	759.88	0	0	13.7	NA	Picea_abies	Yes
417	6.795	243	763.02	284	37.2205	16.9	9.9	Picea_abies	No
418	10.447	291	913.74	418	45.7461	23.6	12.3	Picea_abies	No
419	14.971	396	1243.44	382	30.7212	30.4	11.1	Picea_abies	No
420	12.453	298	935.72	524	55.9997	26.6	15.7	Picea_abies	No
421	11.311	404	1268.56	251	19.7862	33.8	17.7	Picea_abies	No
422	10.327	356	1117.84	524	46.8761	29.5	19.2	Picea_abies	No
423	17.53	505	1585.7	321	20.2434	33.1	18.1	Picea_abies	No
424	NA	242	759.88	63	8.29078	12.4	NA	Picea_abies	Yes
425	10.343	339	1064.46	0	0	28.8	17.2	Picea_abies	No
426	14.286	311	976.54	436	44.6474	30.4	17.9	Picea_abies	No
427	11.264	316	992.24	418	42.1269	27.2	18.3	Picea_abies	No
428	10.607	435	1365.9	321	23.501	29.8	16.3	Picea_abies	No
429	26.404	492	1544.88	442	28.6106	33.5	14.8	Picea_abies	No
430	14.821	206	646.84	529	81.7822	18.7	14.8	Picea_abies	No
431	33.135	518	1626.52	254	15.6162	33.1	14.2	Picea_abies	No
432	26.16	452	1419.28	374	26.3514	35.2	17.1	Picea_abies	No
433	15.468	348	1092.72	216	19.7672	25.1	16.8	Picea_abies	No
434	15.589	351	1102.14	687	62.3333	30.5	7.9	Picea_abies	No
435	11.607	442	1387.88	446	32.1353	33.3	10.5	Picea_abies	No
436	24.767	444	1394.16	243	17.4299	33	11.8	Picea_abies	No
437	16.335	353	1108.42	281	25.3514	28.6	15.3	Picea_abies	No
438	24.051	470	1475.8	0	0	31.9	16.3	Picea_abies	No
439	14.089	327	1026.78	84	8.18092	30.1	16.3	Picea_abies	No
440	17.683	356	1117.84	167	14.9395	29.8	15.9	Picea_abies	No
441	21.034	325	1020.5	332	32.5331	29.9	8.2	Picea_abies	No
442	12.071	312	979.68	141	14.3925	15.7	17.9	Picea_abies	No
443	13.66	418	1312.52	346	26.3615	33.2	18.2	Picea_abies	No
444	19.755	395	1240.3	370	29.8315	30.7	14.6	Picea_abies	No
445	23.317	434	1362.76	223	16.3638	33.2	17.4	Picea_abies	No
446	NA	236	741.04	74	9.98597	14.6	NA	Picea_abies	Yes
447	NA	197	618.58	242	39.1219	16.5	NA	Picea_abies	Yes
448	11.916	313	982.82	214	21.7741	26.6	15.8	Picea_abies	No
449	17.001	406	1274.84	54	4.23583	33	18.7	Picea_abies	No
450	NA	210	659.4	226	34.2736	14.2	NA	Picea_abies	Yes
451	14.259	433	1359.62	0	0	33.4	17.3	Picea_abies	No
452	14.063	413	1296.82	214	16.5019	31.6	15.1	Picea_abies	No
453	21.443	224	703.36	269	38.245	13.1	10.2	Picea_abies	No
454	13.167	327	1026.78	114	11.1027	29.4	13.8	Picea_abies	No
455	NA	231	725.34	72	9.92638	16.1	NA	Picea_abies	Yes
456	16.429	396	1243.44	380	30.5604	32.7	15.2	Picea_abies	No
457	15.625	335	1051.9	314	29.8507	20.1	12.8	Picea_abies	No
458	20.032	383	1202.62	246	20.4553	32.7	14.4	Picea_abies	No
459	17.791	400	1256	146	11.6242	30.9	13.3	Picea_abies	No
460	NA	283	888.62	184	20.7063	18.4	NA	Picea_abies	Yes
461	NA	241	756.74	0	0	14.4	NA	Picea_abies	Yes
462	10.957	268	841.52	0	0	24.2	16.3	Picea_abies	No
463	21.871	466	1463.24	326	22.2793	35.2	16.7	Picea_abies	No
464	11.778	316	992.24	114	11.4892	26.4	14.6	Picea_abies	No
465	16.154	595	1868.3	341	18.2519	32.7	11.1	Picea_abies	No
466	NA	293	920.02	269	29.2385	19.9	NA	Picea_abies	Yes
467	17.823	322	1011.08	287	28.3855	23.9	10.5	Picea_abies	No
468	13.232	484	1519.76	123	8.09338	33	14.9	Picea_abies	No
469	16.166	375	1177.5	254	21.5711	31.5	19.5	Picea_abies	No
470	15.469	421	1321.94	146	11.0444	34.4	15.5	Picea_abies	No
471	17.797	416	1306.24	63	4.823	33.1	14.3	Picea_abies	No
472	20.749	315	989.1	311	31.4427	17.3	14.7	Picea_abies	No
473	19.394	443	1391.02	318	22.8609	30.3	14.5	Picea_abies	No
474	19.194	426	1337.64	567	42.3881	34.6	16.1	Picea_abies	No
475	18.15	478	1500.92	492	32.7799	31.1	14.5	Picea_abies	No
476	25.918	284	891.76	246	27.5859	26.3	13.2	Picea_abies	No
477	NA	207	649.98	115	17.6929	17.2	NA	Picea_abies	Yes
478	22.1	420	1318.8	314	23.8095	33.4	17.2	Picea_abies	No
479	16.909	448	1406.72	154	10.9475	31.8	15.3	Picea_abies	No
480	NA	245	769.3	82	10.659	17.3	NA	Picea_abies	Yes
481	NA	271	850.94	0	0	13.2	NA	Picea_abies	Yes
482	17.363	326	1023.64	0	0	31.2	12.8	Picea_abies	No
483	18.7	328	1029.92	438	42.5276	31.3	17.4	Picea_abies	No
484	38.529	297	932.58	227	24.3411	31.8	14.6	Picea_abies	No
485	16.693	330	1036.2	48	4.63231	27.3	17.6	Picea_abies	No
486	9.993	301	945.14	297	31.4239	23.8	17.6	Picea_abies	No
487	10.621	408	1281.12	162	12.6452	30.2	16.1	Picea_abies	No
488	12.001	351	1102.14	483	43.8238	29.2	16	Picea_abies	No
489	NA	233	731.62	534	72.9887	17.3	NA	Picea_abies	Yes
490	22.715	414	1299.96	303	23.3084	35.1	12.5	Picea_abies	No
491	27.22	513	1610.82	93	5.77346	33.6	9.5	Picea_abies	No
492	21.415	456	1431.84	0	0	34.1	13.2	Picea_abies	No
493	12.59	302	948.28	0	0	26.5	15.8	Picea_abies	No
494	38.944	582	1827.48	32	1.75105	32.9	13.5	Picea_abies	No
495	38.839	571	1792.94	0	0	35.6	13.3	Picea_abies	No
496	16.357	320	1004.8	0	0	23.7	17.1	Picea_abies	No
497	26.136	544	1708.16	93	5.44445	34.8	15.9	Picea_abies	No
498	24.121	386	1212.04	114	9.40563	30.8	16.1	Picea_abies	No
499	14.239	398	1249.72	96	7.68172	33.2	15.9	Picea_abies	No
500	27.333	427	1340.78	226	16.8559	33.2	16.3	Picea_abies	No
501	21.798	446	1400.44	461	32.9182	33.5	12.8	Picea_abies	No
502	24.892	452	1419.28	197	13.8803	33.5	14.4	Picea_abies	No
503	13.56	349	1095.86	0	0	32.7	21.4	Picea_abies	No
504	25.203	424	1331.36	163	12.2431	33.3	13.9	Picea_abies	No
505	NA	234	734.76	63	8.57423	20.2	NA	Picea_abies	Yes
506	49.397	498	1563.72	0	0	35.5	13.4	Picea_abies	No
507	14.51	496	1557.44	36	2.31149	33.6	18.2	Picea_abies	No
508	12.077	378	1186.92	259	21.8212	31.8	17.7	Picea_abies	No
509	15.36	340	1067.6	351	32.8775	27.3	17.3	Picea_abies	No
510	31.425	471	1478.94	194	13.1175	34.7	20.2	Picea_abies	No
511	14.407	401	1259.14	628	49.8753	32.7	17.7	Picea_abies	No
512	14.81	423	1328.22	191	14.3801	31.1	19	Picea_abies	No
513	18.007	362	1136.68	367	32.287	32.2	17.4	Picea_abies	No
514	17.05	398	1249.72	273	21.8449	32.5	6.5	Picea_abies	No
515	12.479	349	1095.86	0	0	31.6	20.2	Picea_abies	No
516	21.913	398	1249.72	0	0	33.5	11.1	Picea_abies	No
